# Supplementary material
Source: publisher figshare collection journal article supplement (https://asha.figshare.com/ndownloader/files/39275039)
Supplement: Supplementary file 1 [file 39275039]

## Sheet: Supplemental Material S4
Supplemental material, Passaretti et al., “Reporting of Classroom-Based Morphological Awareness Instruction and Intervention for Kindergarten to Grade 3 Students in the Literature: A Scoping Review,” LSHSS, https://doi.org/10.1044/2022_LSHSS-22-00090
Supplemental Material S4. Study characteristics, aim, model of service delivery, and characteristics of intended/actual participants.
Citation	Country	Type of Article	Study Aim	Sample Size	Elementary Grade(s)	Age	Sex/Gender	Identified Deficits - none	Identified Deficits -language	Identified Deficits -literacy	Identified Deficits -other	Identified as at risk	not reported	Intervention Context	Service Model	Intervention Format
Allen & Lembke, 2020	USA	RCT	"This study expands on the existing literature by measuring the effect of a morphological awareness intervention on spelling and sentence writing in early elementary grades while also measuring oral language and working memory." (p. 3)	n = 26	2, 3	not reported	46% female					x		not reported	not stated	small group
Apel et al., 2013	USA	quasi-experimental study	"Thus, the purpose of this investigation was to determine the feasibility of using a morphological awareness intervention with kindergartners and first- and second-grade students attending an elementary school with a large number of students on FARL. " (p. 163)	n = 61	K, 1, 2	mean age: K = 65 months; grade 1 = 79 months; grade 2 = 92 months	32 female; 29 male	x						room separate from general classroom	not stated	small group
Apel & Diehm, 2014	USA	RCT	"We investigated the efficacy of a morphological awareness intervention on the morphological awareness and reading skills of students from low-socioeconomic-status homes; we also examined whether the intervention was similarly effective for intervention students who differed in their initial morphological awareness abilities." (p. 65)	n = 151	K, 1, 2	mean age: 70-95 months	83 female; 68 males		x		x	x		room separate from general classroom	not stated	small group
Apel & Werfel, 2014	USA	tutorial	"The purpose of this tutorial is to provide specific information to clinical scientists and other educators for integrating morphological awareness instruction into their written language instruction." (abstract, p. 251)	n/a	K to 6	n/a	n/a						x	general classroom	not stated	not reported
Bowers & Bowers, 2018	UK and Canada	narrative description of practice	"We briefly describe the linguistic organization of the English spelling system and then outline pedagogical and empirical arguments in support of the hypothesis that reading instruction should be designed to teach children the logical and meaningful organization of English spellings." (p. 407, abstract)	n/a	PS, K	not reported	not reported						x	general classroom	not stated	not reported
Brimo, 2016	USA	quasi-experimental study	"The purpose of this pilot study was to investigate whether training morphological awareness would improve morphological awareness skills of students with reading disorders." (p. 35)	n = 10	3	mean age: 9.5 years	3 girls; 7 boys			x	x			room separate from general classroom	not stated	small group
Brinchmann et.al., 2016	Norway	quasi-experimental study	"An important aim of the present study was to design a theoretically based instructional program that could accommodate the challenges of educational practice by focusing on both decoding and linguistic comprehension." (p. 167)	n = 118	3, 4	91-118 months	48 female; 70 male			x				room separate from general classroom	not stated	small group
Casalis & Colé, 2009	France	RCT	"This study examined the relationship between phonological and morphological awareness in kindergarten, and their respective influence on learning to read in first grade, through an experimental training design with three groups of children." (p. 113)	n = 60	K	mean age: 65.80-66.0 months	not reported	x						room separate from general classroom	not stated	small group
Chung et al., 2021	Hong Kong	RCT	"The present study was to evaluate the effects of a locally derived bilingual Chinese-English reading program Joy of Learning Literacy (JOLLY) program (Chung & Lam, 2018) focusing on explicit and systematic training in phonological awareness, morphological awareness, vocabulary knowledge, and word reading. This multi-component intervention targeted specifically the language and literacy needs of …	n = 99	K	mean age: 64.03-64.55 months	42 girls; 57 boys					x		general classroom	not stated	small group
Claravall, 2016	USA	narrative description of practice	not stated	n/a	K to 5	not reported	n/a			x				general classroom	not stated	small group and individual
Claravall, 2013	USA	ethnographic study	"It is in this light that my classroom inquiry aims to explore the importance of morphology instruction on student's literacy development." (p. 2)	n = 12	3, 4, 5	8-10 years	not reported		x		x			general classroom	not stated	whole class
Collins & Wolter, 2019	USA	narrative description of practice	"The purpose of this article is to provide SLPs an inter-professional model for providing quality classroom-based language and literacy instruction that facilitates language success for children with and without language‚ and literacy deficits using a morphological awareness strategy approach." (abstract, p. 781)	n/a	3	n/a	n/a	x	x	x				general classroom	MTSS	whole class
Connor et al., 2014	USA	narrative description of practice	"The purpose of this article is to provide information on the development and testing of Comprehension Tools for Teachers (CTT), a collection of language and literacy interventions that represents the work of multiple investigators from different disciplines with the common thread of improving literacy outcome for elementary students by focusing primarily on linguistic and cognitive processes and…	Study 1: n = 60; Study 2: n = 75	K, 1, 2	not reported	not reported					x		general classroom	RTI	small group
Cunningham, 1998	USA	narrative description of practice	"This article summarizes research and presents practical teaching strategies for developing facility with multisyllabic words." (p. 189)	n/a	3 to HS	not reported	n/a						x	general classroom	not stated	whole class
Devonshire & Fluck, 2010	UK	quasi-experimental study	"Study 1 revealed that, although the intervention was effective in all age groups studied, children in Years 3 and 4 (7- to 9-year olds) made the most progress and were more likely to employ morphological strategies when spelling. Study 2 explored this age group further, and examined the effect of a longer intervention. Educationalists will be better informed if it can be determined whether expli…	n = 72	3, 4	7-9 years	35 girls; 37 boys				x			general classroom	not stated	whole class
Devonshire et al., 2013	UK	simple cross over design	"The purpose of the current study is to investigate the efficacy of two different approaches to the teaching of literacy skills (i.e., word reading, and spelling skills in English)." (p. 85)	n = 120	1, 2	5-7 years	60 girls; 60 boys	x			x			general classroom	not stated	small group
Fallon & Katz, 2020	USA	tutorial	"This tutorial will offer current empirical evidence coupled with specific therapeutic practices to guide intervention planning and implementation for individuals with written language disorders, including dyslexia." (p. 336)	n/a	K to HS	not reported	not reported		x	x				general classroom	not stated	not reported
Fitton et al., 2016	USA	narrative description of practice	"The purpose of this paper is to present evidence-based strategies for supporting ELL literacy development through enhanced vocabulary instruction, a vital component of language development for ELLs." (p. 4)	n/a	not reported	not reported	n/a		x					general classroom	not stated	whole class
Freeman et al., 2019	USA	quasi-experimental study, collective case study	"In the current study, we explored how first-grade students respond to explicit morphological instruction, integrated with science vocabulary and texts, in Greek and Latin roots." (p. 464)	n = 3	1	7 years	2 female; 1 male	x		x				general classroom	not stated	small group
Fumero & Tibi, 2020	USA	clinical focus	"This clinical focus article will highlight the importance and role of morphological awareness (MA)across orthographies, in particular, the role it plays in reading development, specifically with bilingual populations." (p. 572)	n/a	PS, K, 1	n/a	n/a						x	general classroom	not stated	not reported
Goodwin et al., 2012	USA	narrative description of another study	"The current study examines overall trends regarding morphological instruction with the goals of determining whether morphological instruction supports literacy achievement and presenting a clear picture regarding what effective morphological instruction looks like in K-8 classrooms." (p. 461)	n/a	K to 8	not reported	n/a			x				general classroom	not stated	whole class
Green, 2015	USA	narrative description of practice	"Understanding suffixes is critical for improved academic language. This article gives an overview of suffixes and introduces several strategies that teachers can incorporate into their classrooms." (p. 539)	n/a	1 to 12	n/a	n/a						x	general classroom	not stated	whole class
Hauerwas & Walker, 2004	USA	narrative description of practice	"This article describes effective spelling instruction for verbs with inflected endings." (p. 168)	n/a	3	n/a	n/a					x		general classroom	not stated	whole class
Hempenstall, 2015	Australia	narrative description of practice	not stated	n/a	1 to 6	not reported	n/a						x	general classroom	not stated	whole class
Henbest et al., 2019	USA	quasi-experimental study	"Thus, the purpose of this article was to determine the feasibility of an SLP-guided morphological awareness instructional program in a general education classroom." (abstract, p. 771)	n = 30	2	not reported	12 female; 11 male	x		x				general classroom	not stated	whole class
Hernández et al., 2016	USA	narrative description of practice	an aim for this article is not explicitly stated	n/a	K to 4	not reported	not reported						x	general classroom	not stated	whole class
Herrington & Macken-Horarik, 2015	UK	quasi-experimental study	"The study was designed to improve the educational outcomes for rural and regional children which research indicates generally lag behind those of their metropolitan peers..." (p. 63-64)	n = 223	3, 4, 5	not reported	approximately equal numbers of boys and girls					x		general classroom	not stated	whole class
Hickey & Lewis, 2013	USA	narrative description of practice	"In this article, we provide an overview of morphology as it is addressed through the CCLS, identify the issues around the development of morphological awareness in English for second language learners, and share effective instructional practices and resources for appropriately supporting the morphological development of bilingual students." (abstract, p. 69)	n/a	K to 12	n/a	n/a						x	general classroom	not stated	whole class
Ho et al., 2012	Hong Kong	longitudinal study	"Specifically, the present paper aims to (1) develop an evidence-based core reading curriculum in Chinese; and (2) examine the effectiveness of this curriculum for Chinese readers in the first grade to third grade." (p. 864)	n = 223	1, 2, 3	average age was 6 years at beginning of study	114 girls; 109 boys						x	general classroom	RTI	whole class
Lyster, 2015	Canada	narrative description of two studies	"The purpose of this article is to illustrate the use of form-focused tasks as a means to integrate a language focus across the immersion curriculum in two different ways: first, by crossing borders between content areas and, second, by crossing borders between target languages." (p. 4)	not reported	2	7-8 years	not reported						x	general classroom	not stated	whole class
Lyster et al., 2013	Canada	quasi-experimental study	"This article reports on a quasi-experimental classroom study conducted as part of a larger professional development initiative, which involved a partnership with a local school board and aimed to facilitate collaboration between the French and English teachers of the same groups of students at the Grade 2 level." (p. 169)	n = 80	2, 3	7-8 years	30 girls; 35 boys						x	general classroom	not stated	whole class
Lyster, 2002	Norway	RCT	"The aim of this study was to investigate the long-term effects of two different training programs in kindergarten on reading development." (abstract, p. 261)	n = 273	K	5 years 10 months to 6 years 9 months at beginning of study	not reported						x	general classroom	not stated	small group
Lyster et al., 2016	Norway	quasi-experimental study	"This study examined the long-term effects of a morphological and a phonological awareness training programme delivered in preschool on later reading abilities." (p. 1283)	n = 269	K	5-6 years	not reported	x						general classroom	not stated	whole class or small group
Manyak et al., 2018	USA	narrative description of practice	"In this article, we provide teachers with further support in this area by addressing which specific affixes to teach in the upper elementary grades and describing a comprehensive approach for teaching affixes." (p. 289)	n/a	3, 4, 5	not reported	n/a						x	general classroom	not stated	whole class
McKeown, 2019	USA	clinical focus	"This clinical focus article will highlight the importance of vocabulary instruction, in particular, thinking about instruction in terms of focusing student's attention on words and their uses." (abstract, p. 466)	n/a	1, 2, MS	not reported	n/a				x			general classroom	not stated	whole class or individual student
Meaux et al., 2020	USA	tutorial	"The aim of this tutorial is to illustrate the role a school-based speech-language pathologist (SLP) has as a collaborative partner in multitiered system of supports(MTSS) in elementary for morphological knowledge." (abstract, p. 515)	n/a	K, 2, 4	n/a	n/a	x						general classroom	MTSS	whole class, small group or individual
Mountain, 2005	USA	narrative description of practice	"My role, as their university consultant, was to answer the primary teachers' questions about morphemic analysis and to help them with classroom strategies if they decided to blend more instruction on meaningful word parts into their lessons." (p. 743)	n/a	1, 2, 3	not reported	n/a						x	general classroom	not stated	whole class
Nevo & Vaknin-Nusbaum, 2018	Israel	quasi-experimental study	"The present research sought to determine whether a short (nine-week) language and print-concept intervention, delivered by a kindergarten teacher through interactive storybook reading, could improve children's vocabulary, morphology, phonological awareness, print-concept skills and motivation to read." (p. 549)	n = 30	K	At time 1 (first testing), mean age was 5 years, 3 months	16 girls; 14 boys	x						general classroom	not stated	small group
Ossa Parra & Proctor, 2021	USA	ethnomethodological analysis	"In the present study, we contribute to the research base on translanguaging pedagogy by exploring students' participation in a translanguaged literacy pilot." (p. 2)	n = 5	3	not reported	not reported		x	x				not reported	not stated	individual
Packard et al., 2006	China	quasi-experimental study	"The present study investigated whether raising children's awareness of the morphemic and orthographic structure of Chinese words would lead to beneficial results in their learning to write Chinese." (p. 457, in abstract)	n = 144	1	not reported	70 female; 74 male						x	general classroom	not stated	whole class
Ramirez et al., 2014	Canada	quasi-experimental study	"The purpose of this study was to explore the feasibility of teaching morphological awareness and vocabulary in an explicit and systematic manner to kindergartners from socioeconomically disadvantaged homes and to examine the growth in these skills across children starting with different ability levels." (p. 54)	n = 108	K	5 - 6 years	43% female; 57% male					x		general classroom	not stated	whole class and small group
Rasinski et al., 2011	USA	narrative description of practice	"This article attempts to address this situation by making the case for a very productive, efficient, and engaging approach to vocabulary and the study of words." (p. 133)	n/a	1 to 5	not reported	n/a						x	general classroom	not stated	whole class
Wu et al., 2009	China	quasi-experimental/case-control study	"The present study investigated the relationship between morphological awareness and young children's progress in learning to read and write Chinese." (p. 27)	n = 169	1, 2	mean age 6 years 9 months at the start of intervention	82 girls; 87 boys						x	general classroom	not stated	whole class
Yoshimoto, 1997	USA	narrative description of practice	"... this article shows how you and your students with learning disabilities can have fun while learning about the structure and origins of the English language - and along the way improve their vocabulary, spelling, reading comprehension, and writing." (p. 43)	n/a	K to 12	n/a	n/a			x	x	x		general classroom	not stated	whole class
Zhou et al., 2012	Hong Kong	RCT	"The present study compared the effectiveness of phonological awareness and two different types of morphological awareness training for Chinese children's early literacy development." (p. 475-476)	n = 88	K	mean age 74 months	47 girls ; 41 boys						x	general classroom	not stated	whole class
Zoski & Erickson, 2017	USA	narrative description of practice	"This article describes activities for building students' awareness of common suffixes that you can embed in your existing instruction or systematically target in intervention." (p. 491)	n/a	K	n/a	n/a			x		x		general classroom	not stated	whole class and small group
Zoski & Erickson, 2017	USA	RCT	"The purpose of this study was to determine the feasibility of a three-pronged linguistic awareness intervention (i.e., PA, LK, and MA) as compared with the more commonly implemented two-pronged intervention (i.e., PA/LK) or an MA-only intervention for kindergarten students who are at risk for persistent reading difficulties. The primary research question was as follows: Do students receiving a t…	n = 17	K	5 years 6 months to 6 years 11 months at beginning of study	8 female; 9 male				x	x		room separate from general classroom	not stated	small group
